# Supplementary material
Source: MDPI journal article supplement (https://www.mdpi.com/2073-4441/12/6/1708)

Figure S1: Schematics of the Mobile Sampling, Sensing, and Hyperspectral Imaging Platform (MSSHIP).

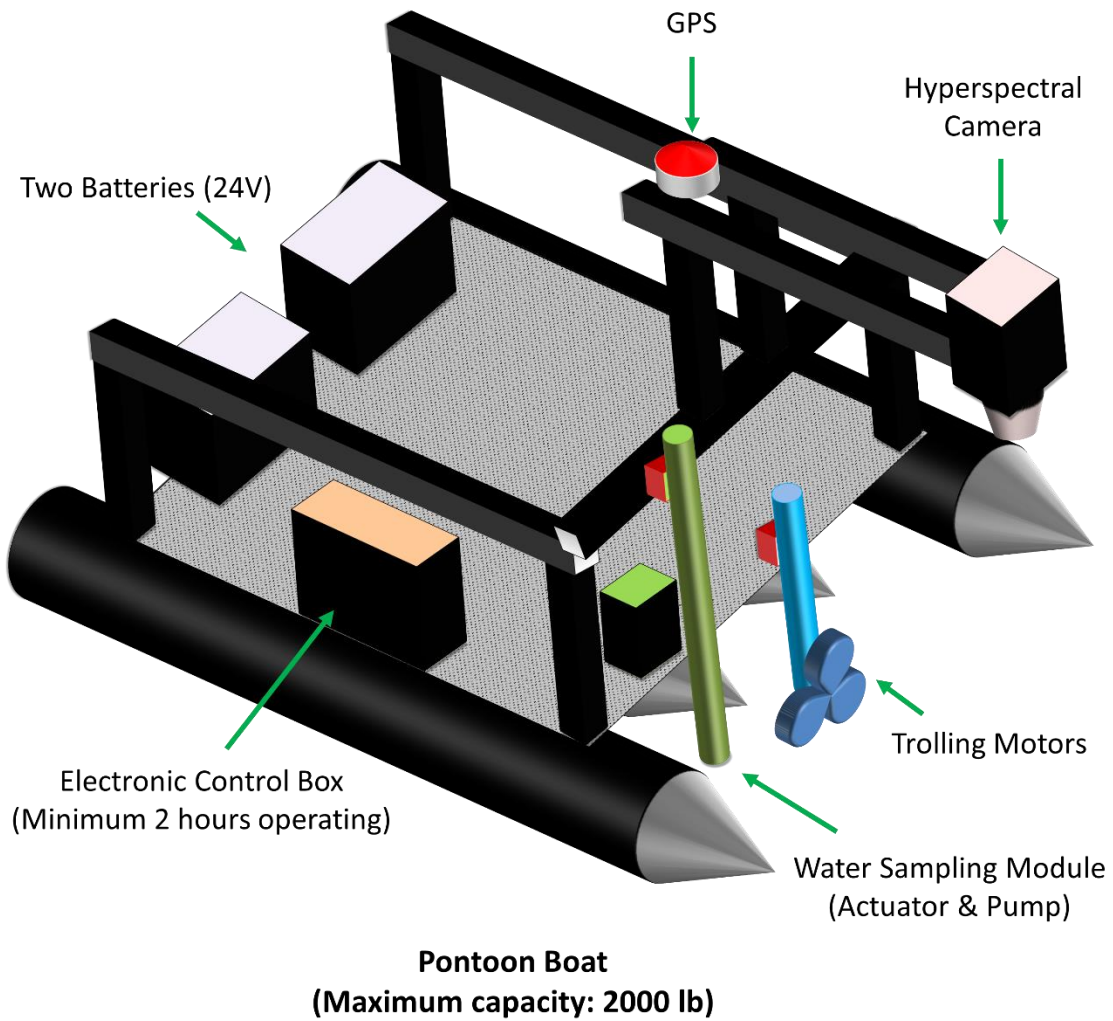

Supplement: s1 [file s1]
